# Supplementary material
Source: HighWire-hosted journal article supplement (https://www.cmaj.ca/highwire/filestream/59124/field_highwire_adjunct_files/1/decision-redditt-2-at.pdf)
Supplement: decision-redditt-2-at.pdf [file decision-redditt-2-at.pdf]

## **Appendix 2 (as supplied by the authors): Sample Latent TB Infection TST**

### **Interpretation using [tstin3d.com](http://tstin3d.com)**

For this patient who is 52-years-old, born in the Philippines, immigrated to Canada at age 50, with unknown BCG status and no known active TB contacts, and with chronic renal failure requiring hemodialysis, a TST reaction of 10-14mm has the following characteristics:<sup>1</sup>

- Likelihood this represents a true positive test (PPV): 97.37%
- Annual risk of development of active TB disease: 1.7%
- Cumulative risk of development of active TB disease, up to age 80: 47.71%
- If treated with INH, probability of developing drug-induced hepatitis: 2.3%
- If treated with INH, probability of hospitalization related to drug-induced hepatitis:  
0.6%

### **Reference**

1. The online TST/IGRA interpreter. Montréal (QC): McGill University. Available: <http://tstin3d.com> (accessed 2013 Oct. 16).
